# Supplementary material for: Association between antidiabetic agents use and leukocyte telomere shortening rates in patients with type 2 diabetes
Source: PubMed Central journal article supplement (PMC6366988; doi:10.18632/aging.101781), 2019-01-28
Supplement: aging-11-101781-s001.pdf [file aging-11-101781-s001.pdf]

## SUPPLEMENTARY FIGURES

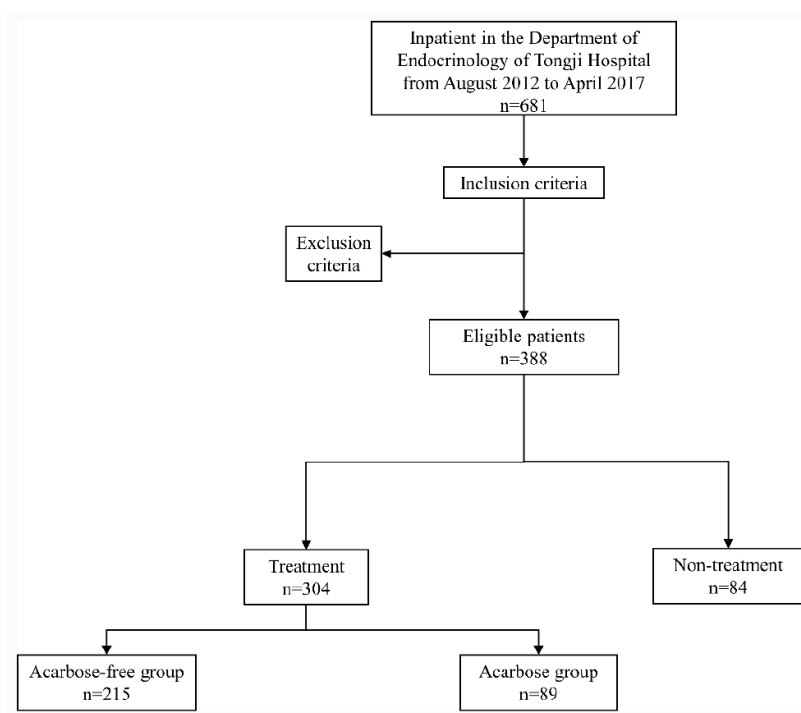

Supplementary Figure 1. The study design of this research.

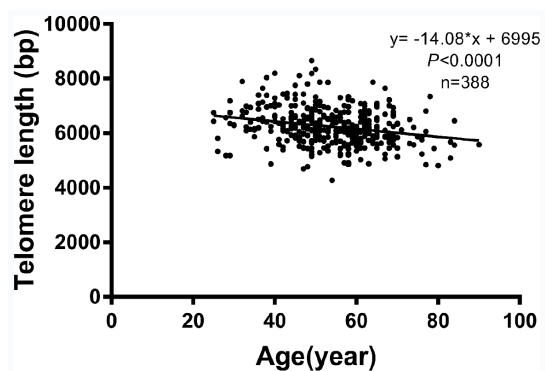

Supplementary Figure 2. Leukocyte telomere length significantly shortened with age in type 2 diabetic patients. Linear regression analysis of the relationship between the telomere length and age in type 2 diabetic patients.

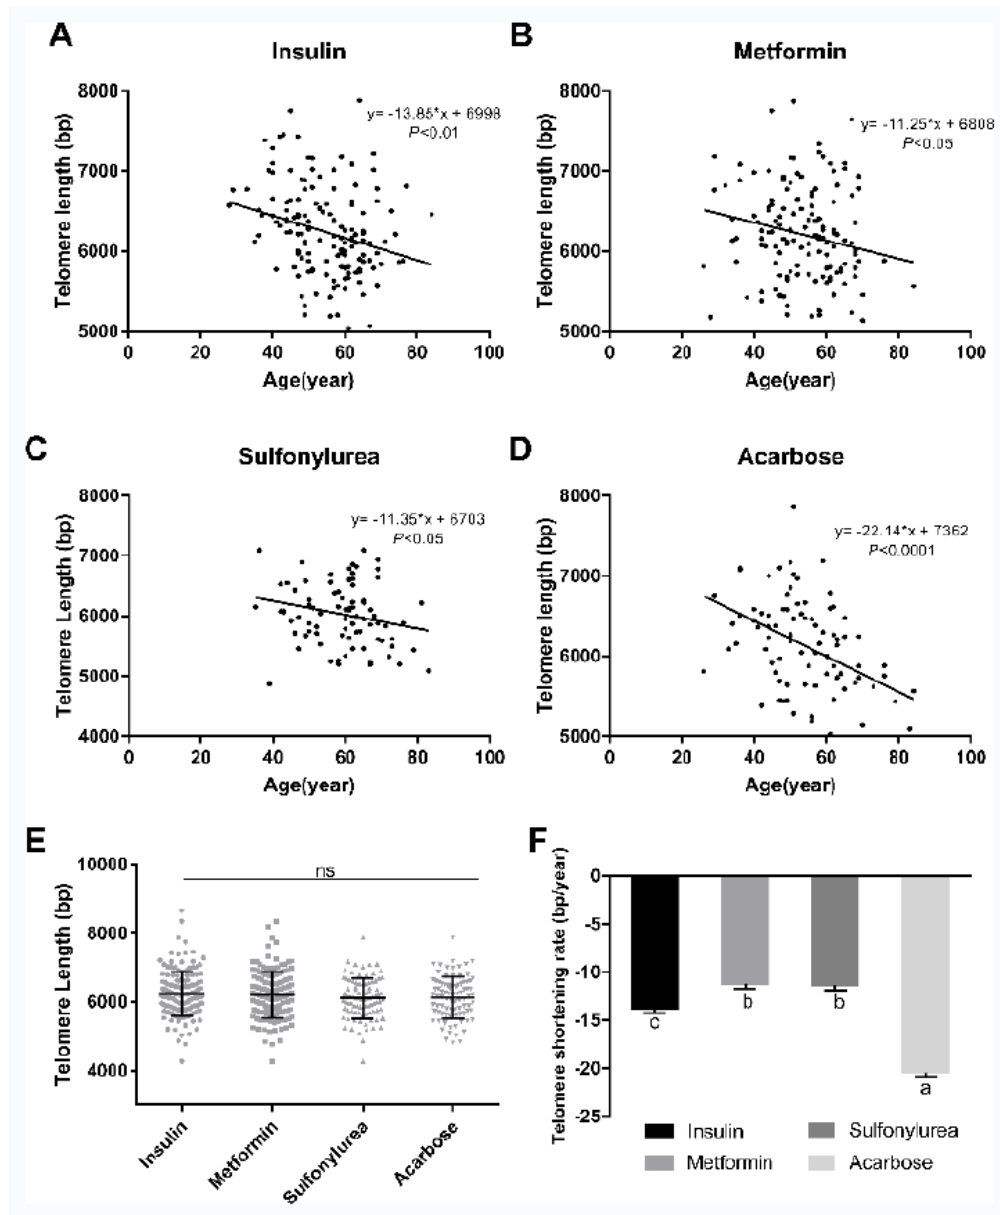

**Supplementary Figure 3. Comparison of the telomere length and telomere shortening rates between various antidiabetic agents in type 2 diabetes patients.** Linear regression analysis of the relationship between the telomere length and age in insulin group (A), metformin group (B), sulfonylurea group (C) and acarbose group (D). Comparison of telomere length (E) and telomere shortening rate (F) in those four groups. The telomere length was represented as the mean±SD. The telomere shortening rates were represented as the mean±SEM. In each panel, groups that share the same letter are not significantly different from each other. ns is mean  $P > 0.05$

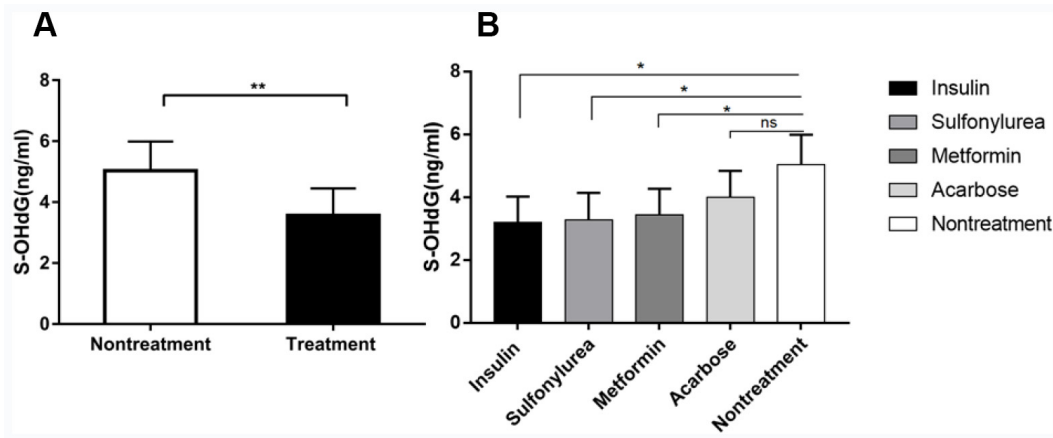

**Supplementary Figure 4. The level of 8-OHdG in different groups. (A)** the level of 8-OHdG in nontreatment and treatment groups. **(B)** the level of 8-OHdG in treatment groups with different anti-diabetic drugs and nontreatment groups. ns is  $P>0.05$ ; \* is  $P<0.05$ ; \*\* is  $P<0.01$

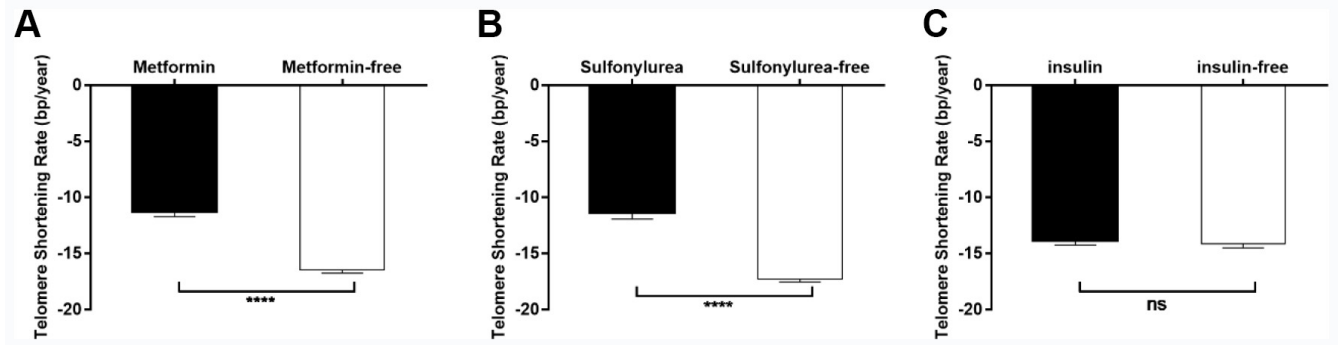

**Supplementary Figure 5. The telomere shorten rate with different antidiabetic agents. (A)** the telomere shorten rate with or without metformin. **(B)** the telomere shorten rate with or without sulfonylurea. **(C)** the telomere shorten rate with or without insulin. The telomere shortening rates were represented as the mean±SEM. \*\*\*\* is  $P<0.0001$ ; ns is  $P>0.05$
