# Supplementary material for: Association between antidiabetic agents use and leukocyte telomere shortening rates in patients with type 2 diabetes
Source: PubMed Central journal article supplement (PMC6366988; doi:10.18632/aging.101781), 2019-01-28
Supplement: aging-11-101781-s002.pdf [file aging-11-101781-s002.pdf]

## SUPPLEMENTARY TABLES

**Supplementary Table 1. Comparison of characteristics of participants with different antidiabetic agents.**

| Characteristic                       | Insulin group | Metformin group | Sulfonylureas group | Acarbose group | P value |
|--------------------------------------|---------------|-----------------|---------------------|----------------|---------|
| Participants (n)                     | 156           | 142             | 89                  | 89             | -       |
| Age(year)                            | 54.46±10.23   | 53.38±10.71     | 57.37±9.855         | 54.13±12.44    | 0.049   |
| Male sex, n (%)                      | 85(54.5)      | 80(56.3)        | 46(51.7)            | 52(58.4)       | 0.819   |
| Fasting plasm glucose(mmol/L)        | 10.37±4.29    | 9.83±3.98       | 10.30±4.30          | 9.89±4.48      | 0.650   |
| Postprandial plasma glucose (mmol/L) | 16.94±6.30    | 16.08±6.06      | 18.54±5.67          | 17.52±7.34     | 0.081   |
| HbA1c, (%)                           | 9.09±2.30     | 8.70±2.24       | 8.86±2.12           | 8.66±2.39      | 0.407   |
| Fructosamine(mmol/L)                 | 367.42±108.26 | 366.07±112.32   | 379.78±92.98        | 384.27±114.89  | 0.657   |
| Chronic complication, n (%)          | 118(75.6)     | 82(57.7)        | 65(73.0)            | 44(49.4)       | <0.0005 |
| Acute complication, n (%)            | 8(5.1)        | 6(4.2)          | 3(3.4)              | 3(3.4)         | 0.888   |

Data are presented as mean ± SD, number or %; P values were calculated using Student's t test or  $\chi^2$  test

**Supplementary Table 2. Multiple liner regression for the association of risk predictors with leukocyte telomere length.**

| Model |                                   | Coefficients <sup>a</sup>   |            | t      | Sig.  |                           |
|-------|-----------------------------------|-----------------------------|------------|--------|-------|---------------------------|
|       |                                   | Unstandardized coefficients |            |        |       | Standardized coefficients |
|       |                                   | $\beta$                     | Std. error |        |       | $\beta$                   |
| 1     | (Constant)                        | 6963.108                    | 183.495    | 37.947 | 0.000 |                           |
|       | Age                               | -13.805                     | 3.291      | -4.195 | 0.000 |                           |
| 2     | (Constant)                        | 6971.516                    | 182.697    | 38.159 | 0.000 |                           |
|       | Age                               | -12.297                     | 3.366      | -3.653 | 0.000 |                           |
|       | Chronic complication <sup>b</sup> | -148.727                    | 76.237     | -1.951 | 0.052 |                           |
| 3     | (Constant)                        | 7028.826                    | 184.087    | 38.182 | 0.000 |                           |
|       | Age                               | -12.234                     | 3.350      | -3.652 | 0.000 |                           |
|       | Chronic complication              | -171.846                    | 76.755     | -2.239 | 0.026 |                           |
|       | Treatment status <sup>c</sup>     | -158.799                    | 80.005     | -1.985 | 0.048 |                           |

Predictors in the Model 1: (Constant), age

Predictors in the Model 2: (Constant), age, chronic complication

Predictors in the Model 3: (Constant), age, chronic complication, treatment status

<sup>a</sup>Dependent Variable: telomere length;

<sup>b</sup>diagnosed with chronic complication;

<sup>c</sup>using anti-diabetic agents and  $\alpha$ -glucosidase inhibitors for glycemic control
